# Supplementary material
Source: PubMed Central journal article supplement (PMC6597924)
Supplement: mnp-0005-0162-s01.pdf [file mnp-0005-0162-s01.pdf]

Supplementary Table 1.

| <b>Gene</b>      | <b>Forward primer</b>   | <b>Reverse primer</b>     |
|------------------|-------------------------|---------------------------|
| <i>Gabra2</i>    | TATGGTCTCTGCTGCTTGTT    | GCCTCATCTTCTTGGATGTTA     |
| <i>Gabra5</i>    | CCCAACACCTCAACAACC      | GTTCTGCCTCCAAAGACC        |
| <i>Gabbr2</i>    | CCTCATGTTGTTTCGGTTGT    | AATGTACTTGCTGTGCGTTGAG    |
| <i>Gat1</i>      | TGGTTGGACTGGAAAGGT      | ACTCCACGGAAGAAGCAGG       |
| <i>Gphn</i>      | TTACAACAGGTGCTCCAATC    | TTCAAGTTCTTCAAGTACCATCATC |
| <i>Gabarap</i>   | TACCAGGAACACCATGAAGA    | TCACAGACCATAGACGCTTT      |
| <i>Gabarapl1</i> | GTTATGATTGCCAGCGTTT     | ACTTATGGGATGAGGAGCAG      |
| <i>Gria1</i>     | AAGCAGACGGAAATTGCT      | TCCACATCTTCTCAAACACAG     |
| <i>Gria3</i>     | CTGACACACGACGCAATAC     | GCACAGCAGGATTTGCTA        |
| <i>Grm1</i>      | TGGCGTTGATGACAAATC      | TACCTGGACACCTCTTGGAA      |
| <i>Grik3</i>     | GTGCTCCTTGCCTACCTG      | ACCACTCGTAAGGGCTGA        |
| <i>Grin3a</i>    | TGGAGTGCAGTACCTGAAGA    | TAATCCAGAAGGGCTTTGTC      |
| <i>Slc25a22</i>  | GGAGCAGCAGTAAACCTGA     | GGTGTCTGAAGAAGTCATTAGC    |
| <i>Grip1</i>     | TTCTGGTCTCAAGCATTGG     | TGCCAAGAGGGTGCATGTT       |
| <i>Drd1</i>      | GGACATACGCCATTTTCATC    | CTGGGCAATCCTGTAGATACT     |
| <i>Drd2</i>      | AGATGCTTGCCATTGTTCTT    | TTCAGGATGTGCGTGATG        |
| <i>Drd5</i>      | AGTCAGTCACACCTTCAGGAC   | CTTGAGAATCCCGCATCTA       |
| <i>Comt</i>      | ATGCAGTGATTCGGGAGT      | ATTCGCACGGCTGAGTAG        |
| <i>Maoa</i>      | GTGAGGCAGTGTGGAGGT      | CCCAAGGAGGACCATTATC       |
| <i>Maob</i>      | GATCCACATTGACCAGACAG    | TGGAATGGCACTAATCACATA     |
| <i>Creb1</i>     | GATTCTAGTGCCCAGCAAC     | GGACGCCATAACAACCTCC       |
| <i>Creb3</i>     | AGATGTCTAGGCTGATACTGACC | CTTGTTCTCCACCTTAGTGA      |
| <i>Crebbp</i>    | AACGACACAGCCTCACAAT     | CGTAGCTCCTCGGGTTTA        |
| <i>Ddc</i>       | TCTGAATGGTGTGGAGTTTG    | GGTTAAGTCAGTCCTCCTCTTC    |

**Supplementary Table 2. Statistical values associated with effects of stress on gene expression.** Numbers in bold indicate comparisons that were significant at 5% False Discovery Rate within each gene category.

|           | Gene             | PFC                                       | BLA                 | NAC                                       | Interactions                                                                              |
|-----------|------------------|-------------------------------------------|---------------------|-------------------------------------------|-------------------------------------------------------------------------------------------|
| Dopamine  | <i>Drd1</i>      | <b>F = 5.475; p &lt; 0.03</b>             | F = 0.017; p > 0.8  | <b>F = 6.909; p &lt; 0.02</b>             | PFC: Stress x Genetic: F = 5.561; p < 0.03                                                |
|           | <i>Drd2</i>      | F = 0.0001; p > 0.9                       | F = 1.824; p > 0.15 | <b>F = 11.375; p &lt; 0.0025</b>          |                                                                                           |
|           | <i>Drd5</i>      | <b>F = 8.753; p &lt; 0.01</b>             | F = 1.325; p > 0.2  | <b>F = 5.918; p &lt; 0.03</b>             | NAC: Stress x Hormone: F = 5.325; p < 0.03                                                |
|           | <i>Comt</i>      | <b>F = 21.637; p &lt; 10<sup>-5</sup></b> | F = 1.774; p > 0.1  | <b>F = 20.253; p &lt; 10<sup>-5</sup></b> |                                                                                           |
|           | <i>Maoa</i>      | <b>F = 9.266; p &lt; 0.006</b>            | F = 1.451; p > 0.2  | <b>F = 30.281; p &lt; 10<sup>-6</sup></b> |                                                                                           |
|           | <i>Maob</i>      | F = 0.989; p > 0.3                        | F = 0.017; p > 0.8  | <b>F = 28.961; p &lt; 10<sup>-6</sup></b> | PFC: Stress x Genetic: F = 4.321; p < 0.05<br>PFC: Stress x Hormone: F = 6.001; p < 0.025 |
|           | <i>Creb1</i>     | <b>F = 12.356; p &lt; 0.002</b>           | F = 0.904; p > 0.3  | <b>F = 36.101; p &lt; 10<sup>-6</sup></b> |                                                                                           |
|           | <i>Creb3</i>     | <b>F = 9.653; p &lt; 0.005</b>            | F = 2.464; p > 0.1  | <b>F = 16.333; p &lt; 10<sup>-4</sup></b> | PFC: Stress x Genetic: F = 6.772; p < 0.02                                                |
|           | <i>Crebbp</i>    | <b>F = 29.039; p &lt; 10<sup>-6</sup></b> | F = 1.372; p > 0.25 | <b>F = 44.315; p &lt; 10<sup>-7</sup></b> | PFC: Stress x Genetic: F = 4.794; p < 0.04                                                |
|           | <i>Ddc</i>       | <b>F = 4.971; p &lt; 0.04</b>             | F = 0.389; p > 0.5  | <b>F = 19.982; p &lt; 10<sup>-5</sup></b> |                                                                                           |
| GABA      | <i>Gabra2</i>    | <b>F = 11.785; p &lt; 0.003</b>           | F = 1.507; p > 0.2  | <b>F = 21.647; p &lt; 10<sup>-5</sup></b> |                                                                                           |
|           | <i>Gabra5</i>    | <b>F = 13.614; p &lt; 0.002</b>           | F = 1.858; p > 0.1  | <b>F = 7.726; p &lt; 0.01</b>             |                                                                                           |
|           | <i>Gabbr2</i>    | F = 2.196; p > 0.1                        | F = 1.933; p > 0.15 | <b>F = 47.375; p &lt; 10<sup>-8</sup></b> | PFC: Stress x Genetic: F = 6.553; p < 0.02                                                |
|           | <i>Gat1</i>      | F = 1.182; p > 0.2                        | F = 3.116; p < 0.09 | <b>F = 25.826; p &lt; 10<sup>-5</sup></b> |                                                                                           |
|           | <i>Gabarapl1</i> | <b>F = 6.59; p &lt; 0.02</b>              | F = 2.219; p > 0.1  | <b>F = 16.458; p &lt; 10<sup>-4</sup></b> |                                                                                           |
|           | <i>Gabarap</i>   | <b>F = 47.727; p &lt; 10<sup>-8</sup></b> | F = 0.058; p > 0.8  | <b>F = 10.764; p &lt; 0.004</b>           |                                                                                           |
|           | <i>Gphn</i>      | F = 4.182; p < 0.05                       | F = 0.704; p > 0.4  | <b>F = 45.84; p &lt; 10<sup>-7</sup></b>  |                                                                                           |
| Glutamate | <i>Gria1</i>     | <b>F = 22.957; p &lt; 10<sup>-5</sup></b> | F = 1.868; p > 0.15 | <b>F = 55.751; p &lt; 10<sup>-7</sup></b> |                                                                                           |
|           | <i>Gria3</i>     | F = 3.797; p < 0.07                       | F = 4.396; p < 0.05 | <b>F = 18.387; p &lt; 10<sup>-4</sup></b> | PFC: Stress x Genetic: F = 5.711; p < 0.03<br>PFC: Stress x Hormone: F = 5.004; p < 0.04  |
|           | <i>Grm1</i>      | F = 3.653; p < 0.07                       | F = 3.89; p < 0.06  | <b>F = 37.196; p &lt; 10<sup>-7</sup></b> |                                                                                           |
|           | <i>Grik3</i>     | F = 0.007; p > 0.9                        | F = 2.041; p > 0.15 | <b>F = 38.448; p &lt; 10<sup>-7</sup></b> |                                                                                           |
|           | <i>Grin3a</i>    | <b>F = 8.22; p &lt; 0.008</b>             | F = 3.84; p < 0.07  | <b>F = 38.085; p &lt; 10<sup>-7</sup></b> | PFC: Stress x Genetic: F = 9.751; p < 0.005                                               |
|           | <i>Slc25a22</i>  | <b>F = 6.386; p &lt; 0.02</b>             | F = 4.758; p < 0.04 | <b>F = 18.451; p &lt; 10<sup>-4</sup></b> |                                                                                           |
|           | <i>Grip1</i>     | <b>F = 11.111; p &lt; 0.003</b>           | F = 4.316; p < 0.05 | F = 2.137 p > 0.1                         |                                                                                           |

**Supplementary Figure 1. Schematic indicating locations for tissue punches.**

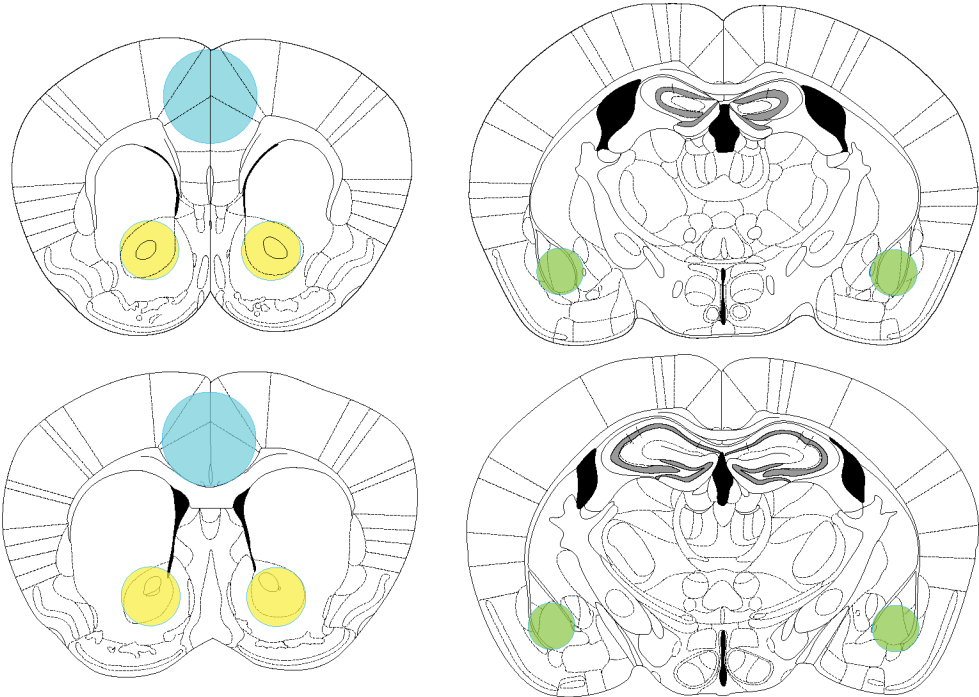

● Prefrontal cortex

● Nucleus accumbens

● Basolateral amygdala
